# Supplementary material for: Monitoring metallofulfenamic–bovine serum albumin interactions: a novel method for metallodrug analysis
Source: Royal Society of Chemistry journal article supplement (doi:10.1039/c4ra07638a), 2014-01-01
Supplement: c4ra07638a1.pdf [file c4ra07638a1.pdf]

**Monitoring the metallofulfenamic – bovine serum albumin interactions: Novel methodology for metallodrug detection in aqueous solution**

**Hani Nasser Abdelhamid<sup>1,3</sup>, Hui-Fen Wu<sup>1,2,4,5,6\*</sup>**

<sup>1</sup>Department of Chemistry, National Sun Yat-Sen University, Kaohsiung, 804, Taiwan

<sup>2</sup>School of Pharmacy, College of Pharmacy, Kaohsiung Medical University, Kaohsiung, 800, Taiwan

<sup>3</sup>Department of Chemistry, Assuit University, Assuit, 71515, Egypt

<sup>4</sup>Center for Nanoscience and Nanotechnology, National Sun Yat-Sen University, Kaohsiung, 804, Taiwan

<sup>5</sup>Doctoral Degree Program in Marine Biotechnology, National Sun Yat-Sen University and Academia Sinica, Kaohsiung, 80424, Taiwan

<sup>6</sup>Medical Science and Technology, National Sun Yat-Sen University, Kaohsiung, 804, Taiwan

\* Corresponding author. Phone: 886-7-5252000-3955. Fax: 886-7-525-3908.

E-mail: [hwu@faculty.nsysu.edu.tw](mailto:hwu@faculty.nsysu.edu.tw)

Contract/grant sponsor: National Science Council (NSC), Taiwan

**Fig. S1**

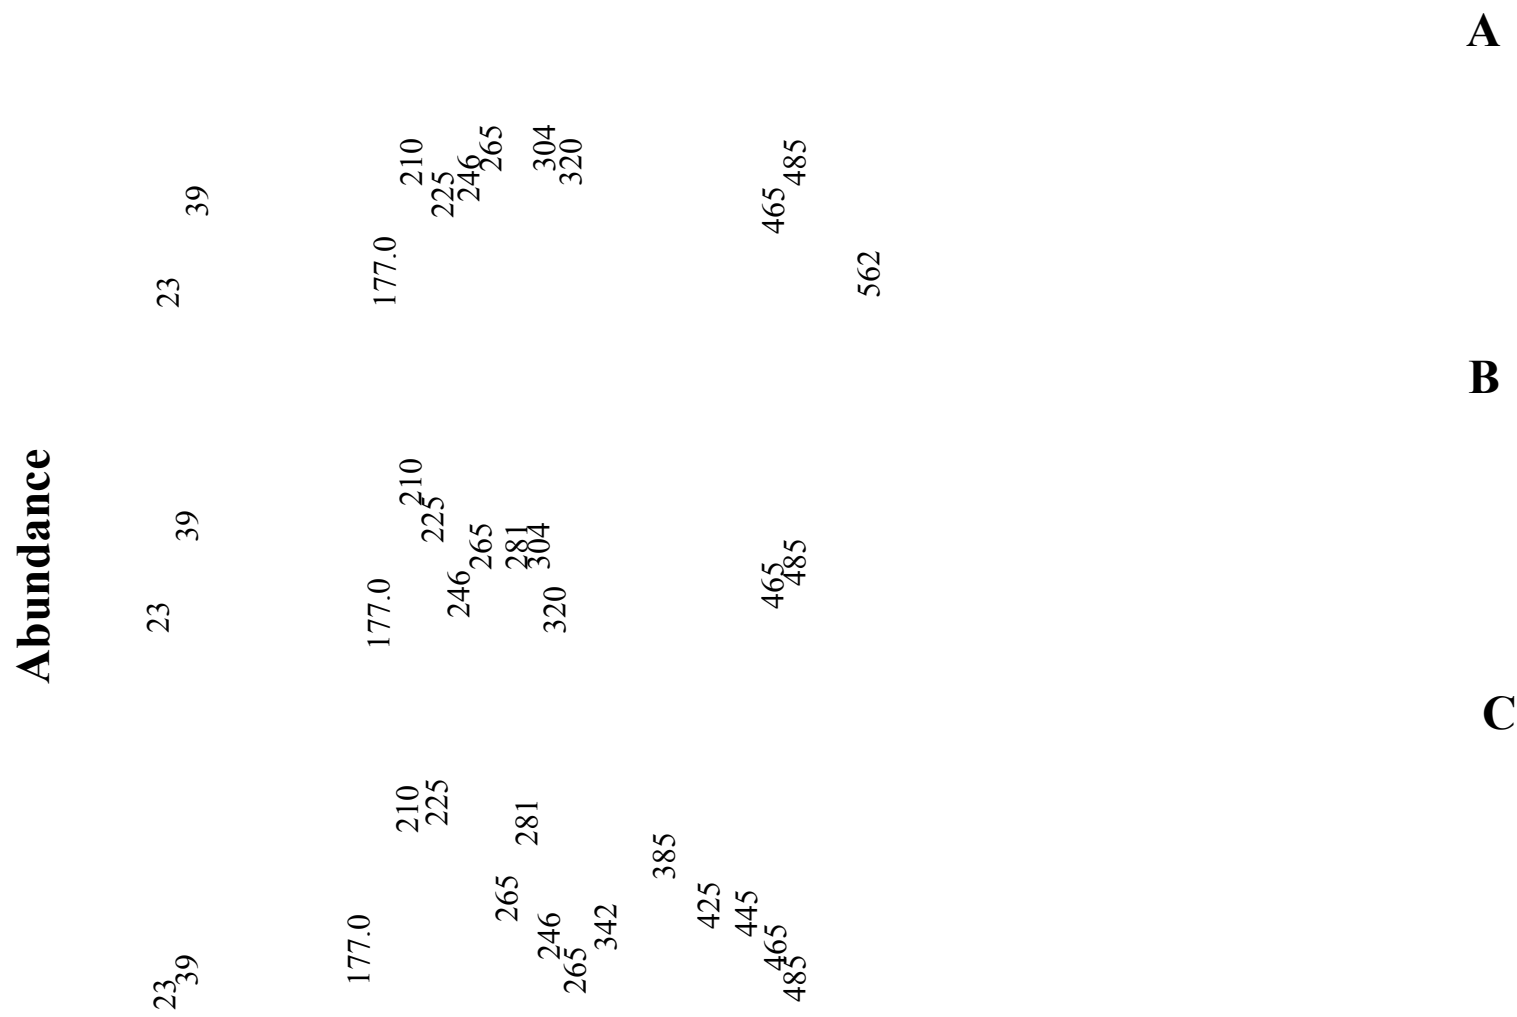

**Figure S1:** MALDI-MS spectra of fulfenamic acid and its complexes using 2,5-DHB as the matrix. A) FFA, B) Cu(II)-FFA, and C) D) Fe (III)-FFA.

**Fig S2:** FTIR spectra of (A) BSA in liquid and their interactions with (B) FFA, (C) Cu(II)-FFA, and (D) Fe(III)-FFA
